# Supplementary material for: Single-cell transcriptomics reveals evolutionary reconfiguration of embryonic cell fate specification in the sea urchin Heliocidaris erythrogramma
Source: PubMed Central journal article supplement (PMC11092583; doi:10.1101/2024.04.30.591752), 2024-05-01

Ant Neurog  
1° sig ctr  
ectoderm  
endoderm  
NSM  
skeletalog  
pigment  
immune  
R coelom  
L coelom  
neurons  
germline

*onecut*

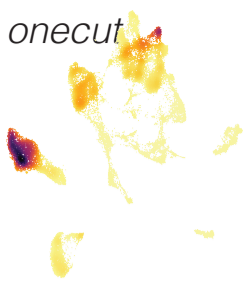

*foxQ2*

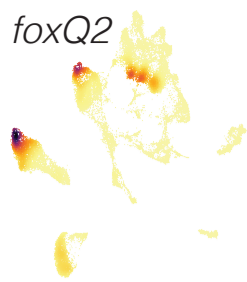

*hbn*

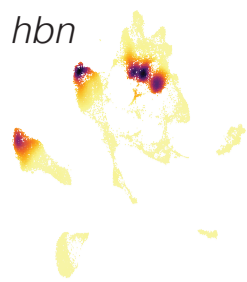

*zic1*

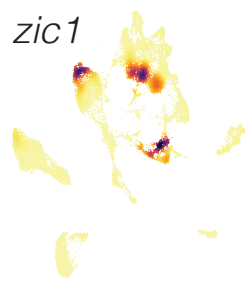

*nkx3.2*

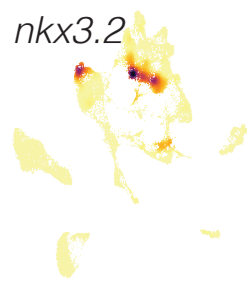

*delta*

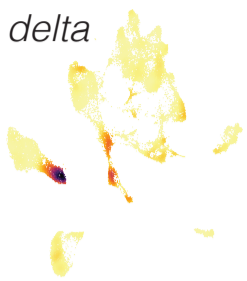

*wnt1*

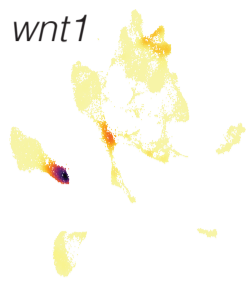

*wnt8*

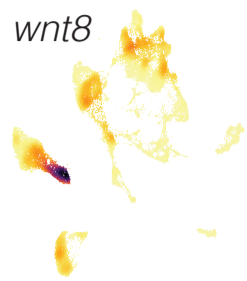

*soxB2*

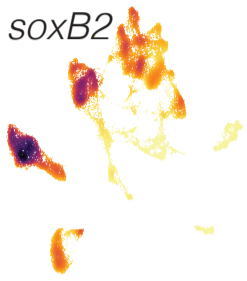

*hmx*

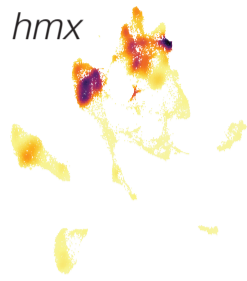

*emx*

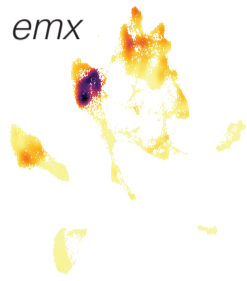

*ars*

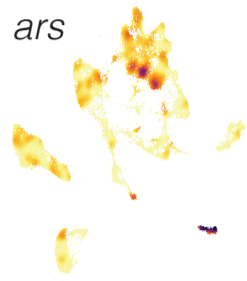

*dri*

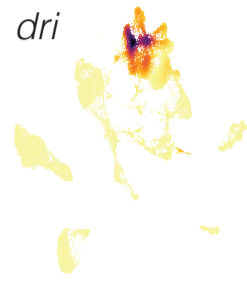

*foxA*

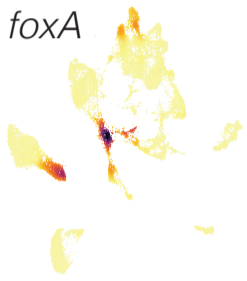

*ism*

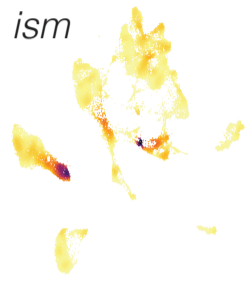

*blimp1*

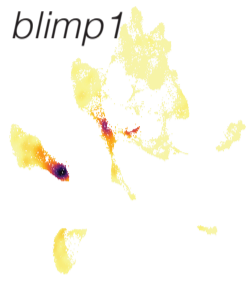

*endo16*

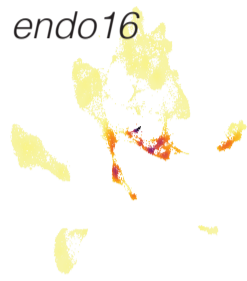

*hnf1-1*

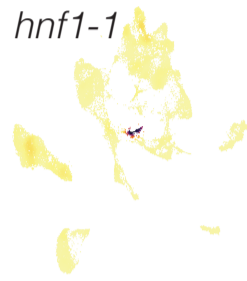

*gcm*

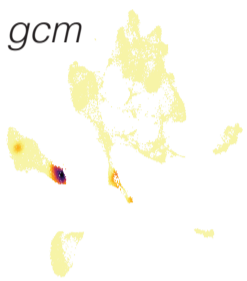

*erg*

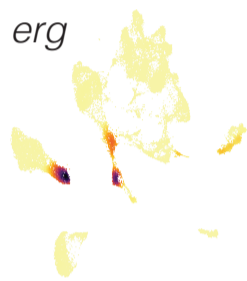

*ese*

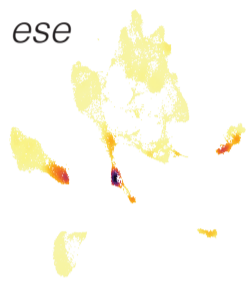

*hox11/13b*

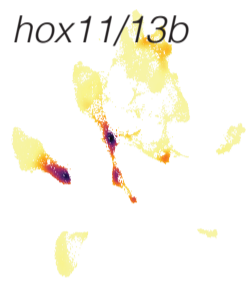

*foxN2-3*

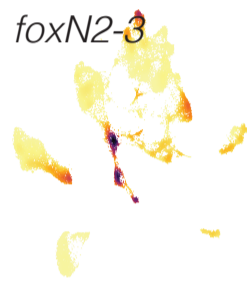

*alx1*

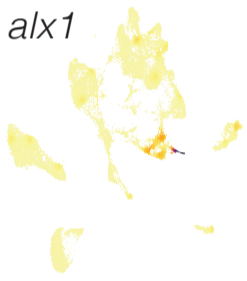

*ets1*

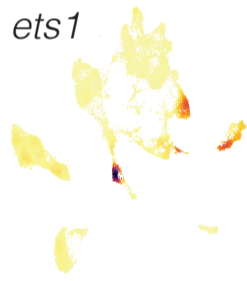

*sm32*

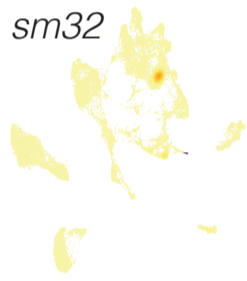

*sm37*

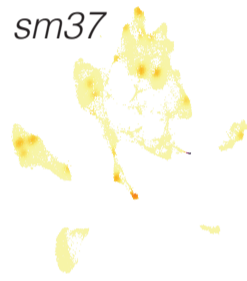

*c-lectin*

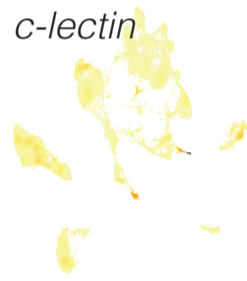

*pks1*

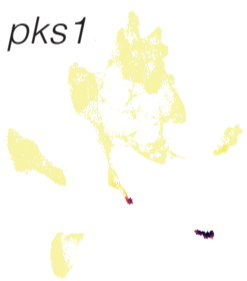

*e78A*

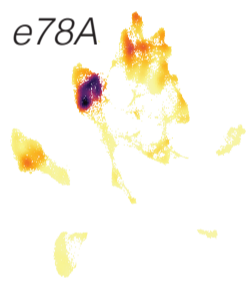

*ars*

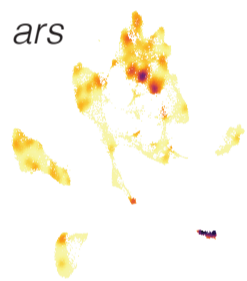

*irf4*

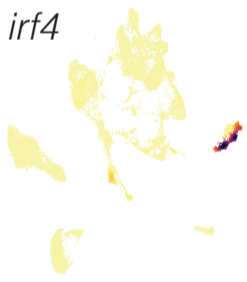

*prox1*

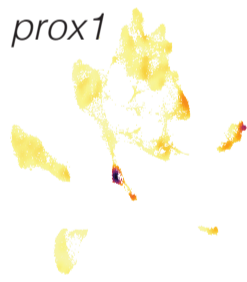

*scl*

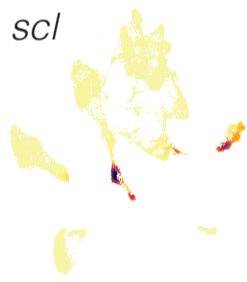

*pitx2*

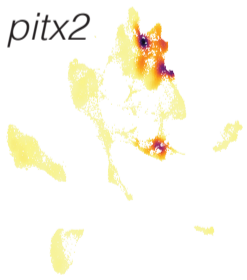

*irxA*

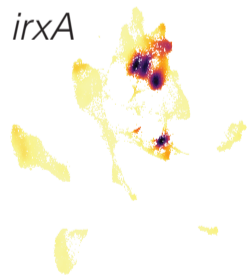

*foxB*

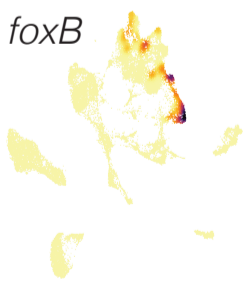

*soxE*

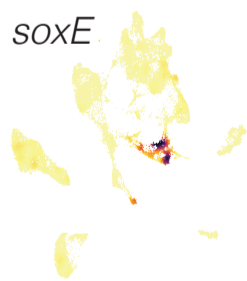

*foxY*

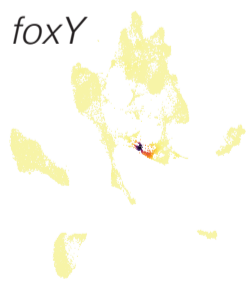

*chat*

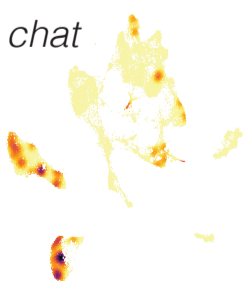

*acsc*

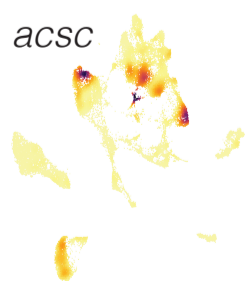

*th*

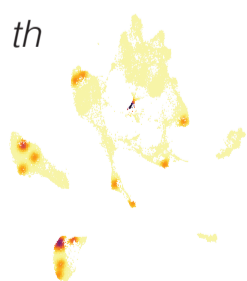

*otp*

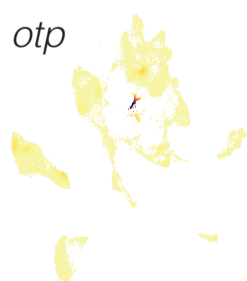

*nanos2*

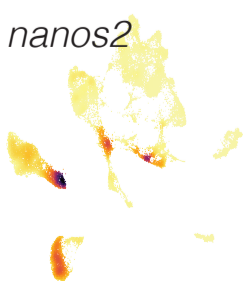

*vasa*

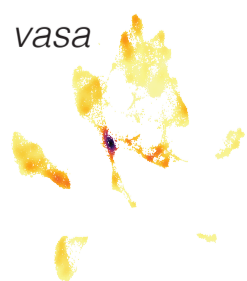

Supplement: media-2.pdf [file media-2.pdf]
