# Supplementary material for: Single-cell transcriptomics reveals evolutionary reconfiguration of embryonic cell fate specification in the sea urchin Heliocidaris erythrogramma
Source: PubMed Central journal article supplement (PMC11092583; doi:10.1101/2024.04.30.591752), 2024-05-01

anterior neurogenic domain

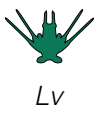

Lv

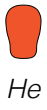

He

*hbn*

*foxQ2*

*nkx3-2*

*zic1*

*acsc*

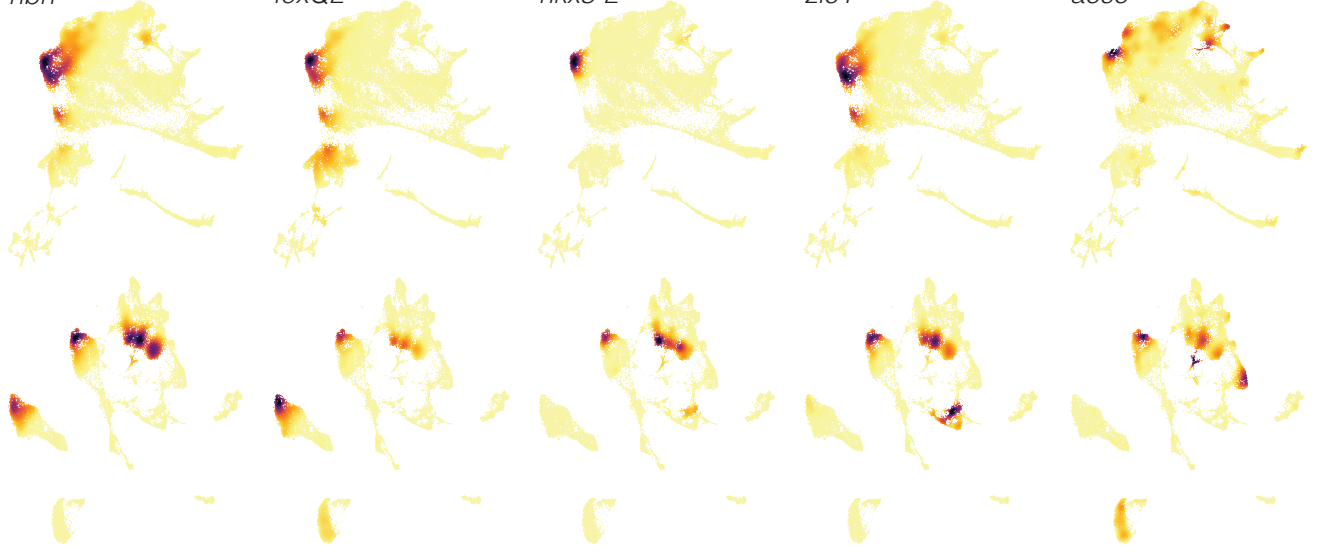

ciliated band

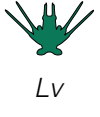

Lv

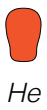

He

*univin*

*onecut*

*emx*

*hmx*

*tgfb*

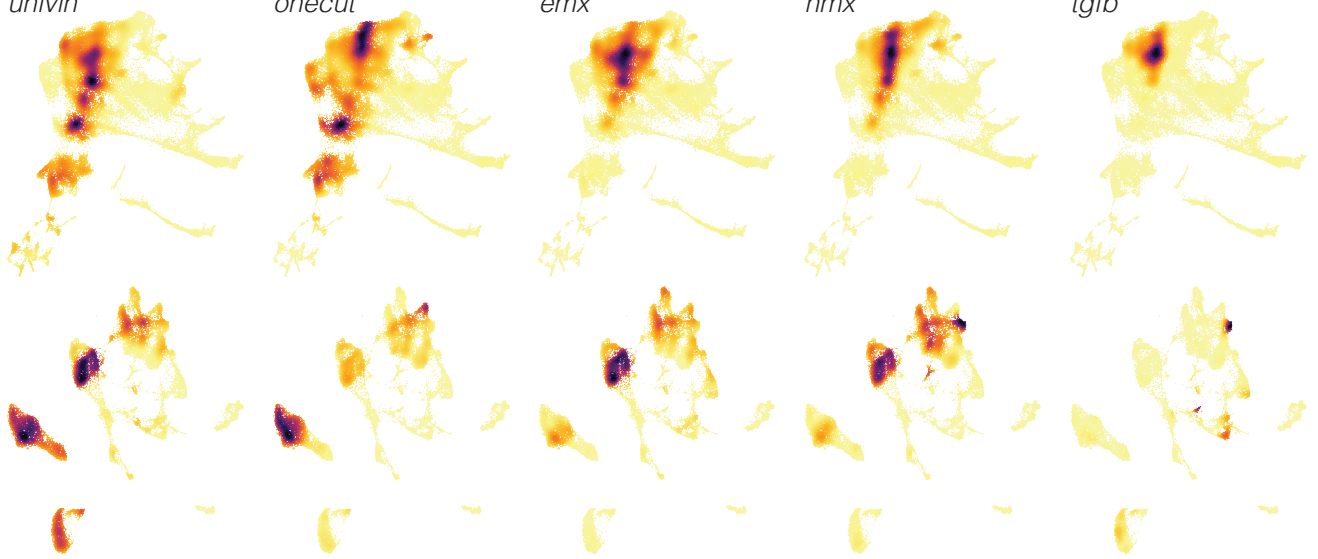

oral ectoderm

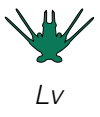

Lv

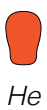

He

*nodal*

*gsc*

*lefty*

*bmp2-4*

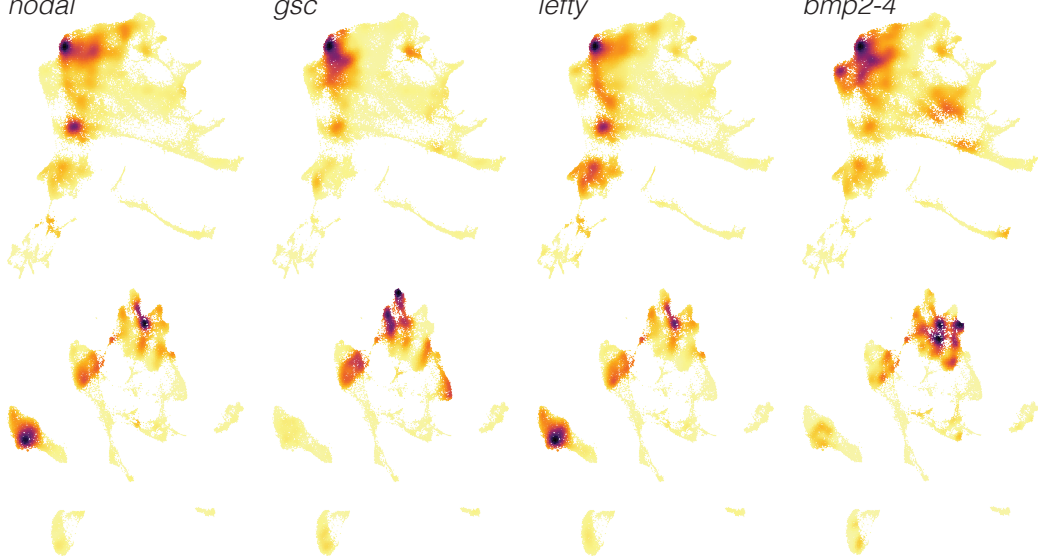

aboral ectoderm

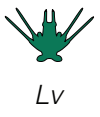

Lv

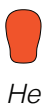

He

*nkx2.2*

*vegf3*

*wntA*

*unc4.1-1*

*hox7*

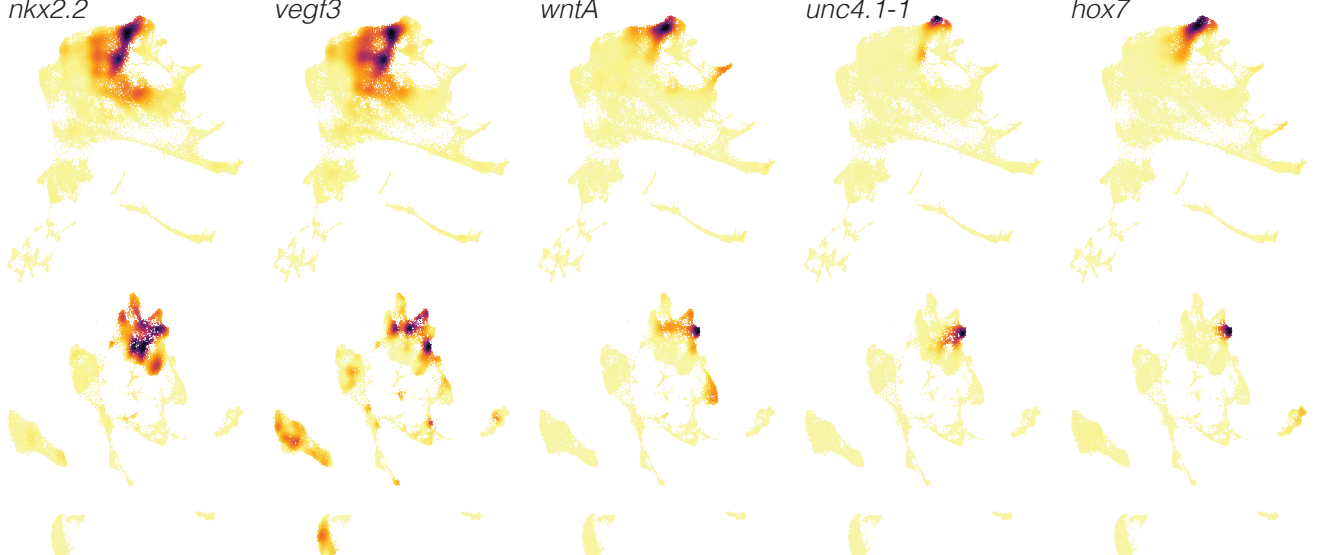

multi-territory ectoderm

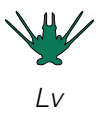

Lv

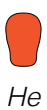

He

*soxB2*

*emx*

*six3*

*foxJ1*

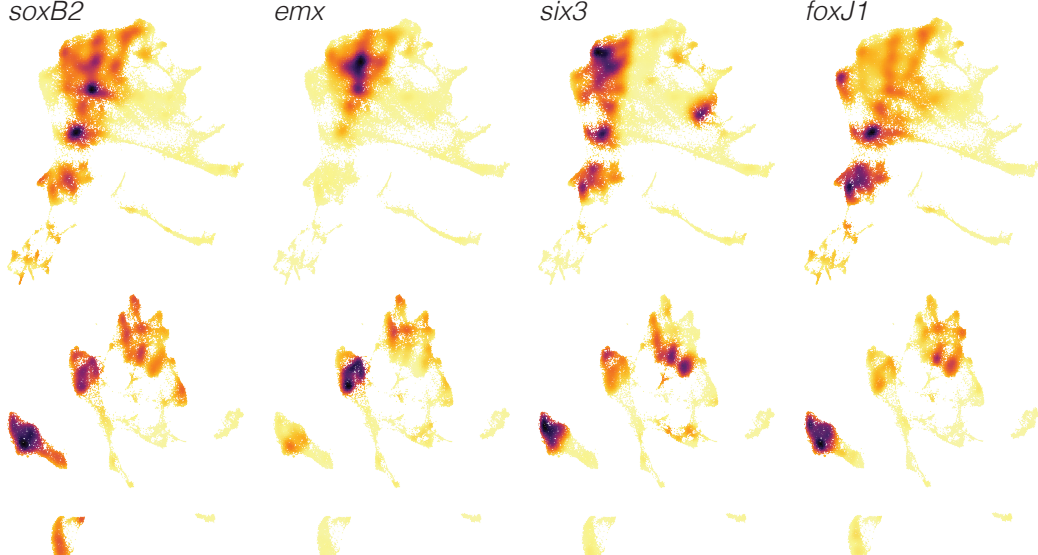

Supplement: media-3.pdf [file media-3.pdf]
