# Supplementary material for: Single-cell transcriptomics reveals evolutionary reconfiguration of embryonic cell fate specification in the sea urchin Heliocidaris erythrogramma
Source: PubMed Central journal article supplement (PMC11092583; doi:10.1101/2024.04.30.591752), 2024-05-01

**nFeature\_RNA**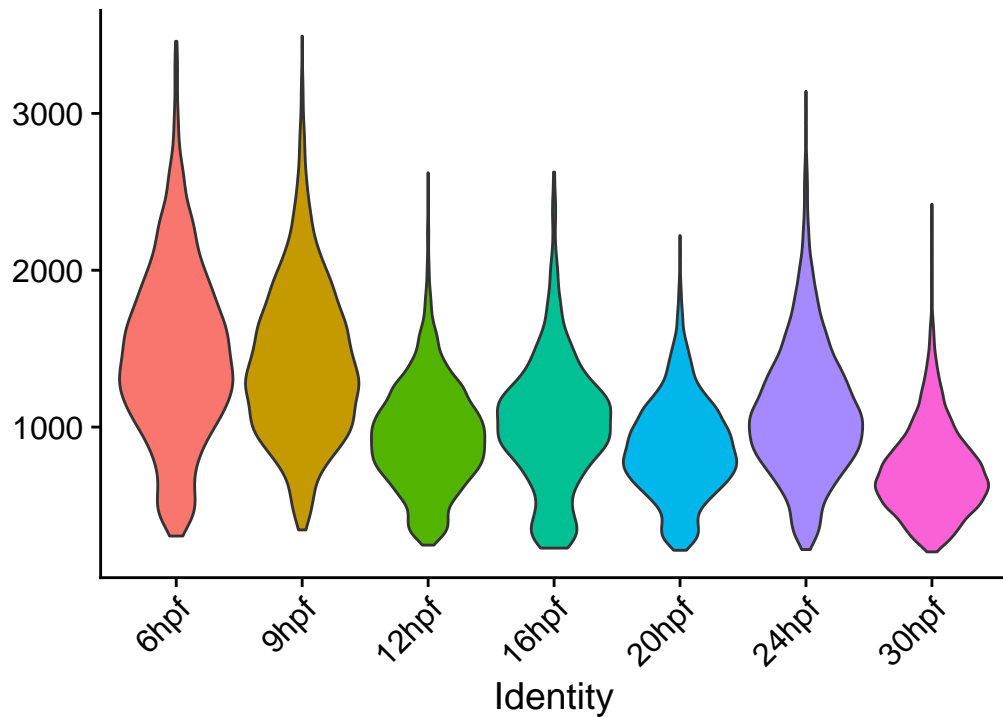**nCount\_RNA**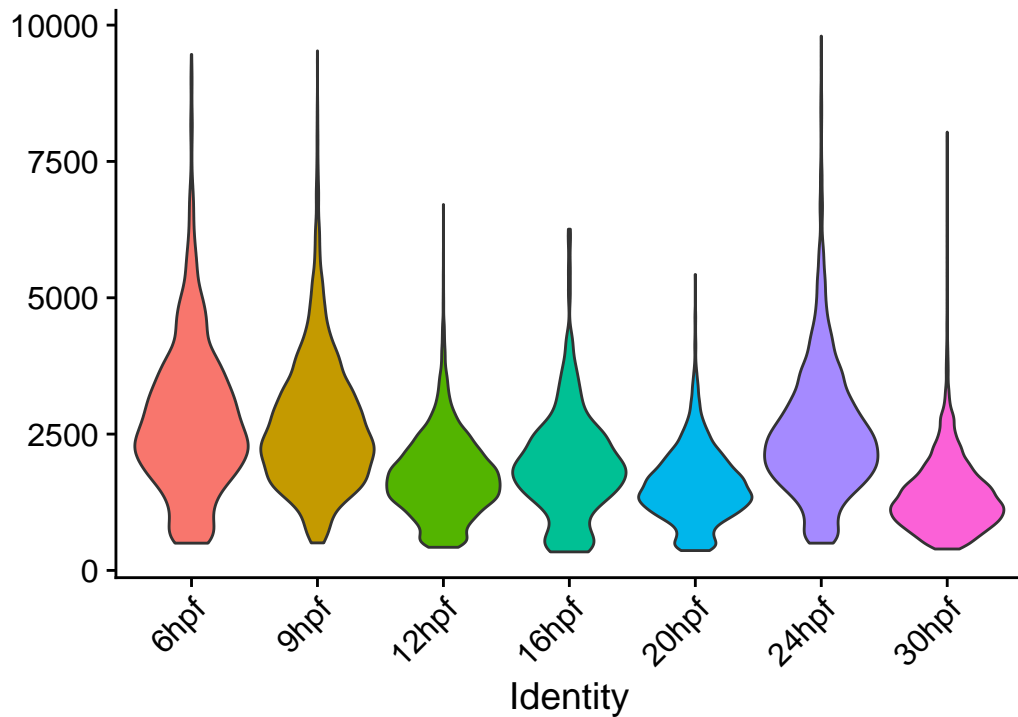**percent.ribo**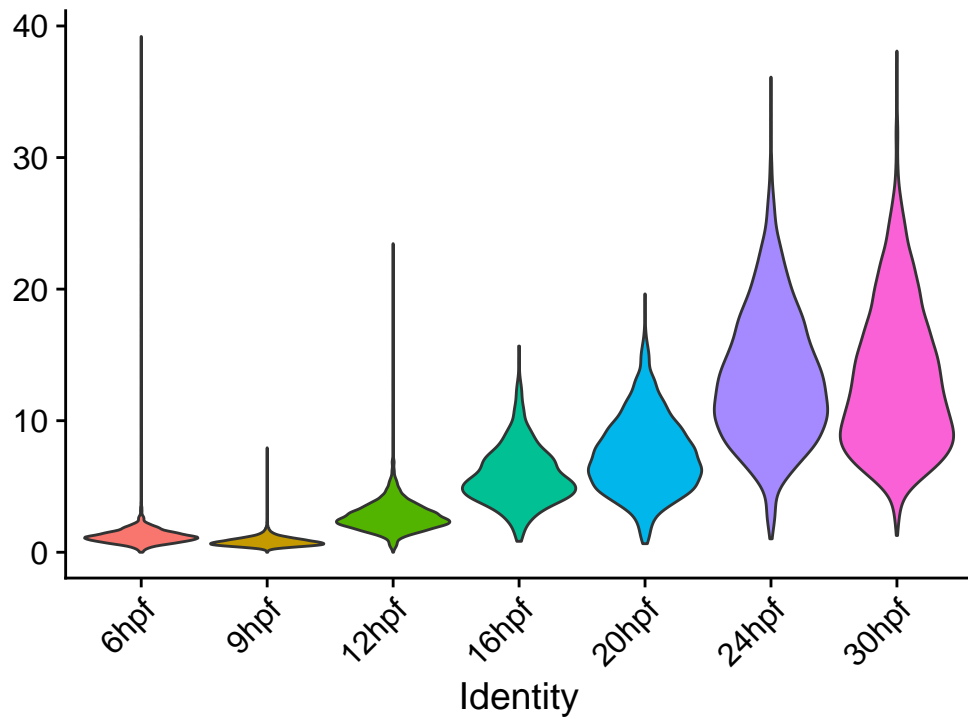**cell.cycle**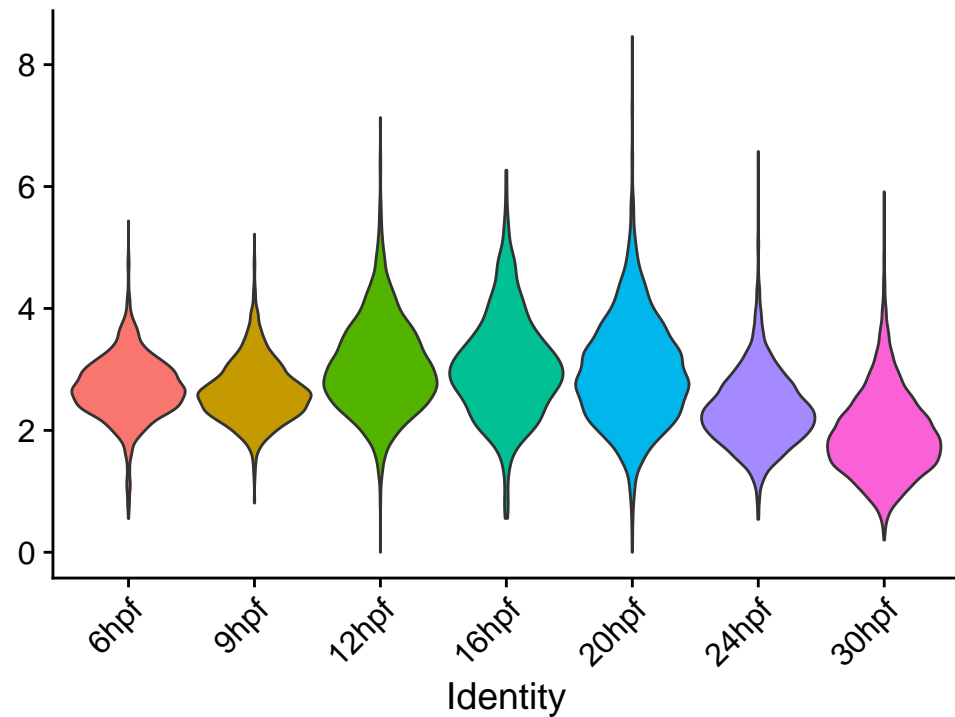

Supplement: media-1.pdf [file media-1.pdf]
