# Supplementary material for: Single-cell transcriptomics reveals evolutionary reconfiguration of embryonic cell fate specification in the sea urchin Heliocidaris erythrogramma
Source: PubMed Central journal article supplement (PMC11092583; doi:10.1101/2024.04.30.591752), 2024-05-01

*L. variegatus*

*H. erythrogramma*

Experimentally validated interaction

Scenario 1

Scenario 2

Scenario 3

Scenario 4

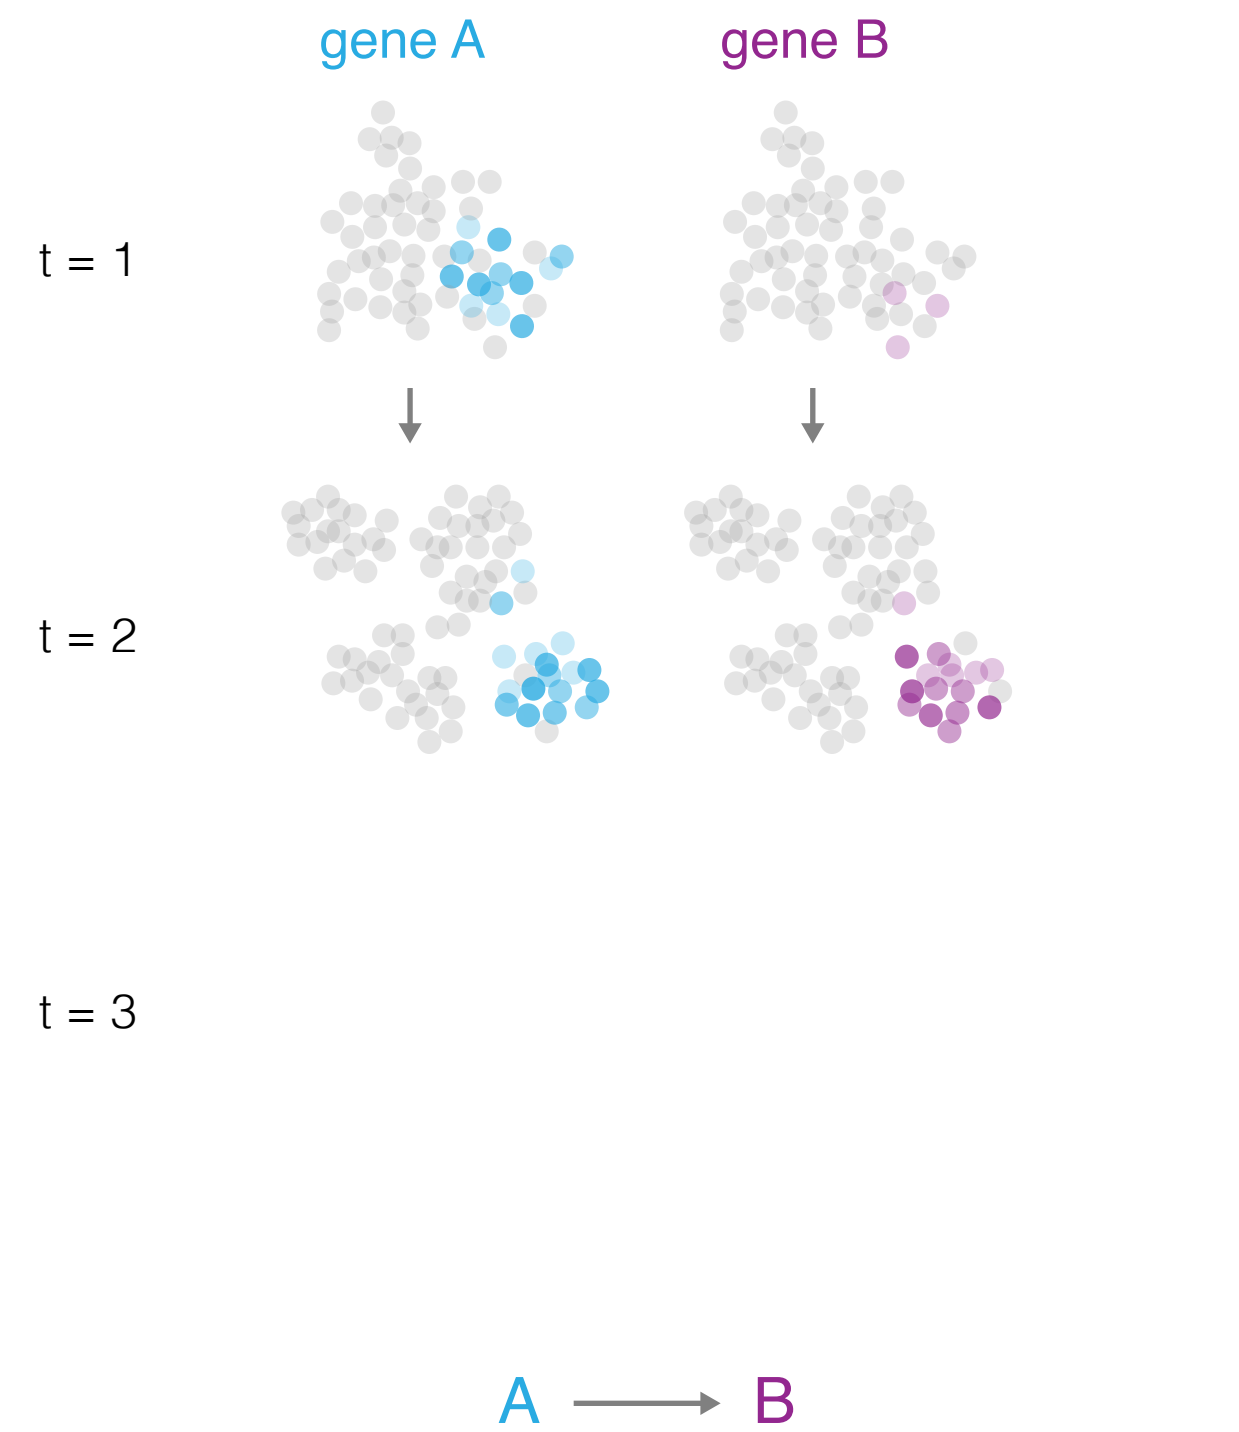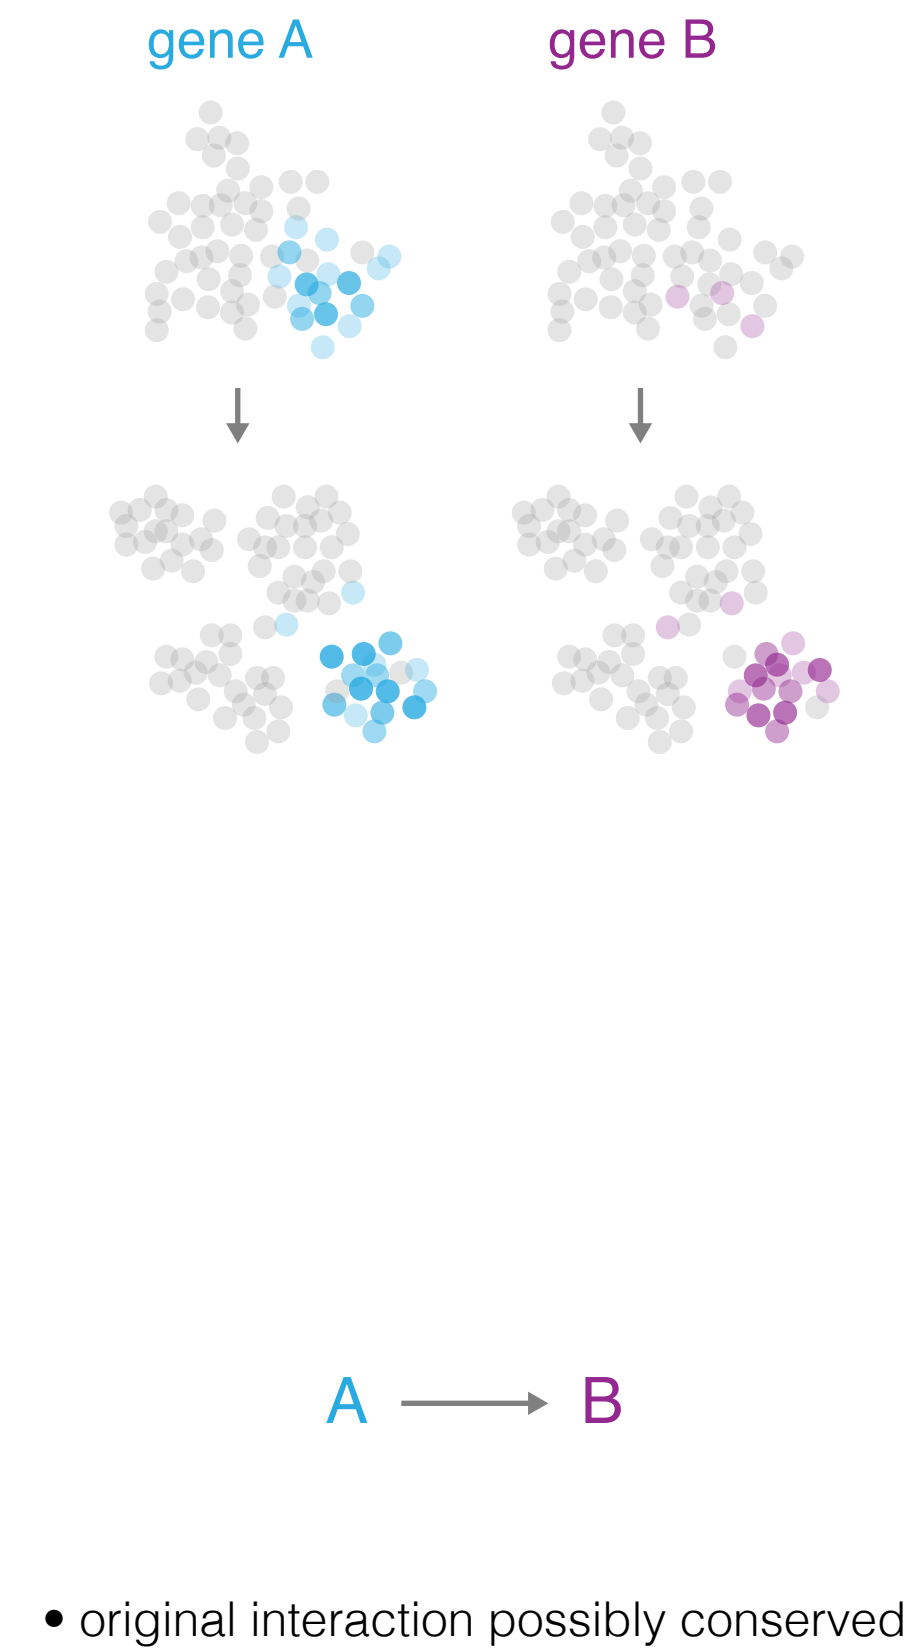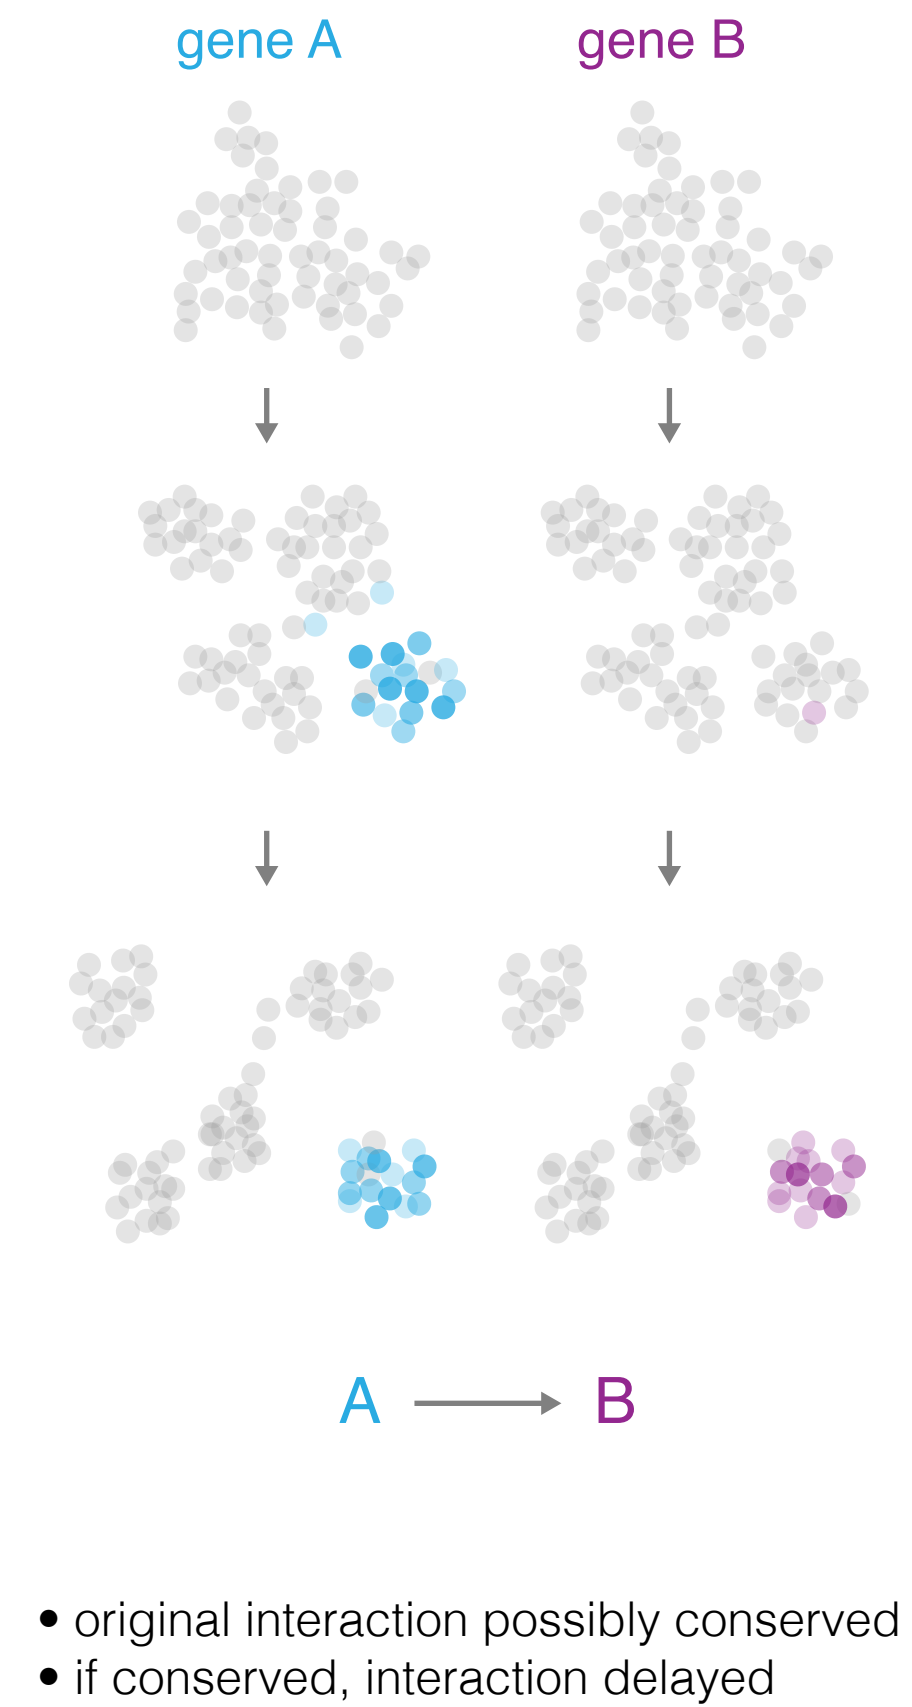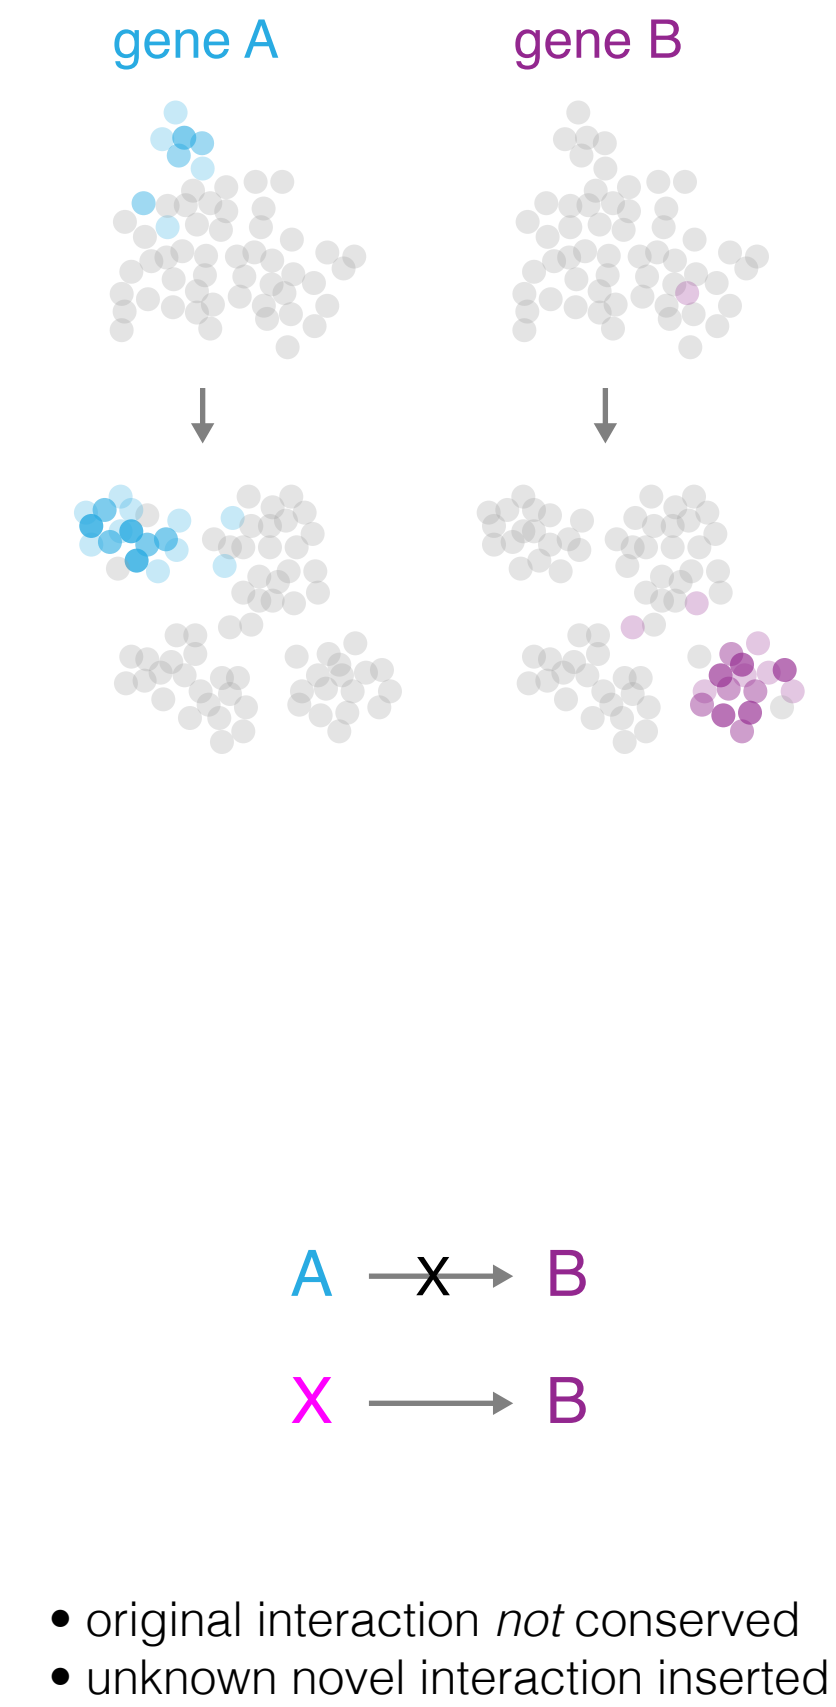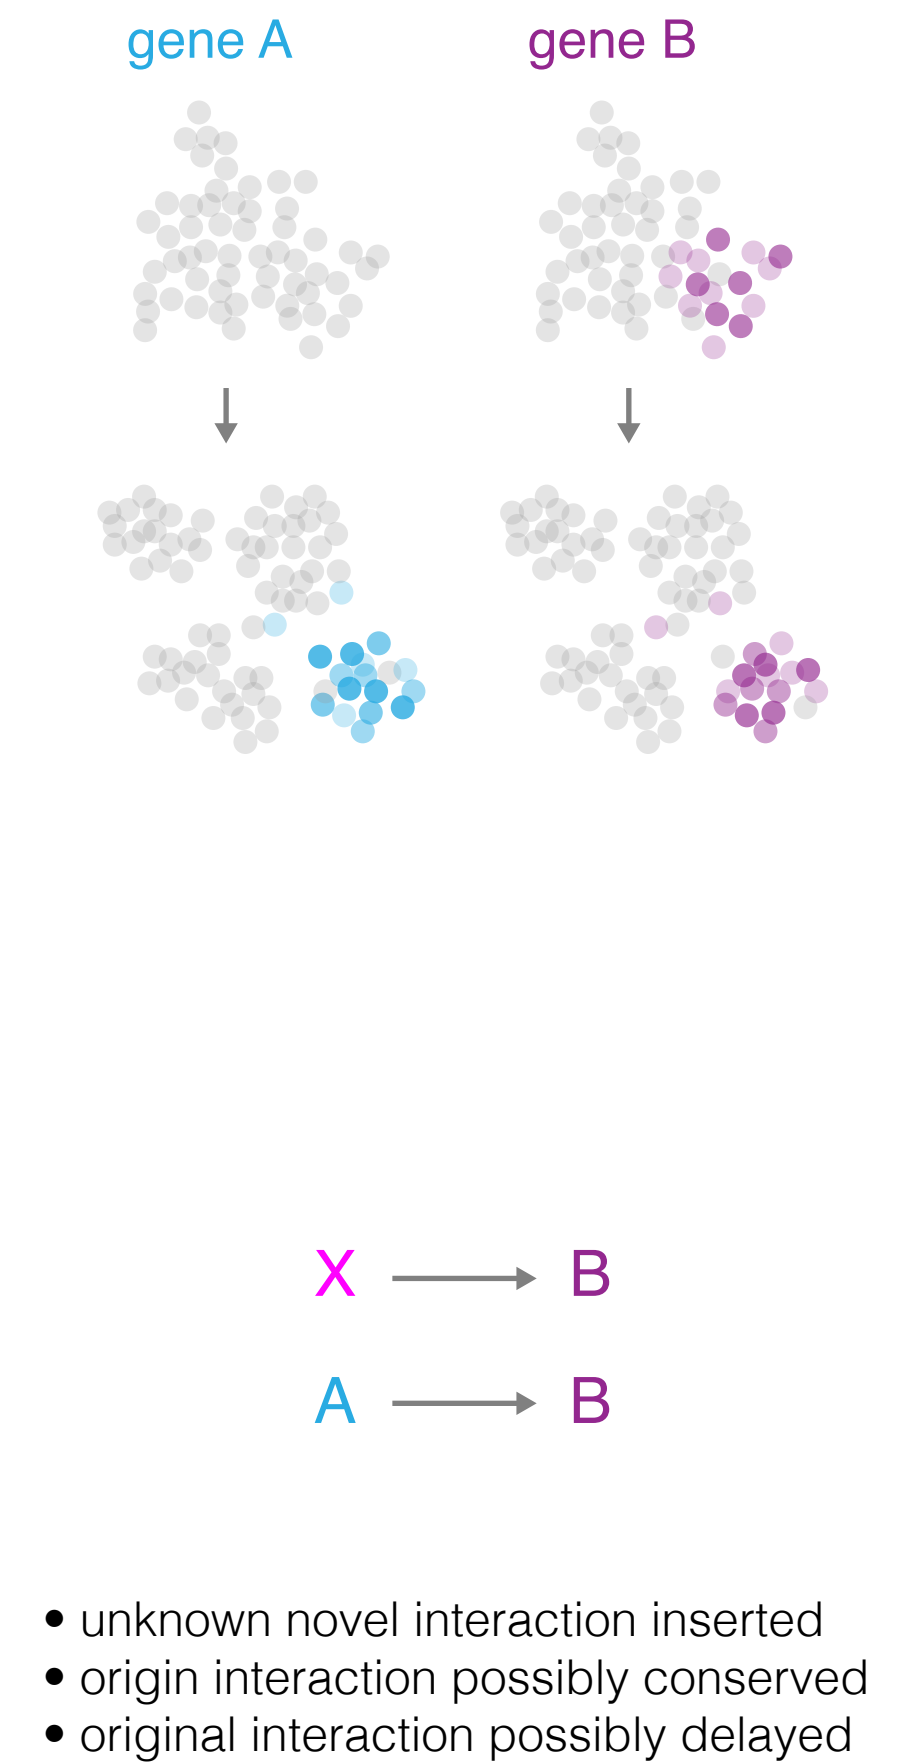

Supplement: media-6.pdf [file media-6.pdf]
