# Supplementary material for: Single-cell transcriptomics reveals evolutionary reconfiguration of embryonic cell fate specification in the sea urchin Heliocidaris erythrogramma
Source: PubMed Central journal article supplement (PMC11092583; doi:10.1101/2024.04.30.591752), 2024-05-01

## Tgif targets

## Tbr targets

## Ets1 targets

## Erg targets

## Dri targets

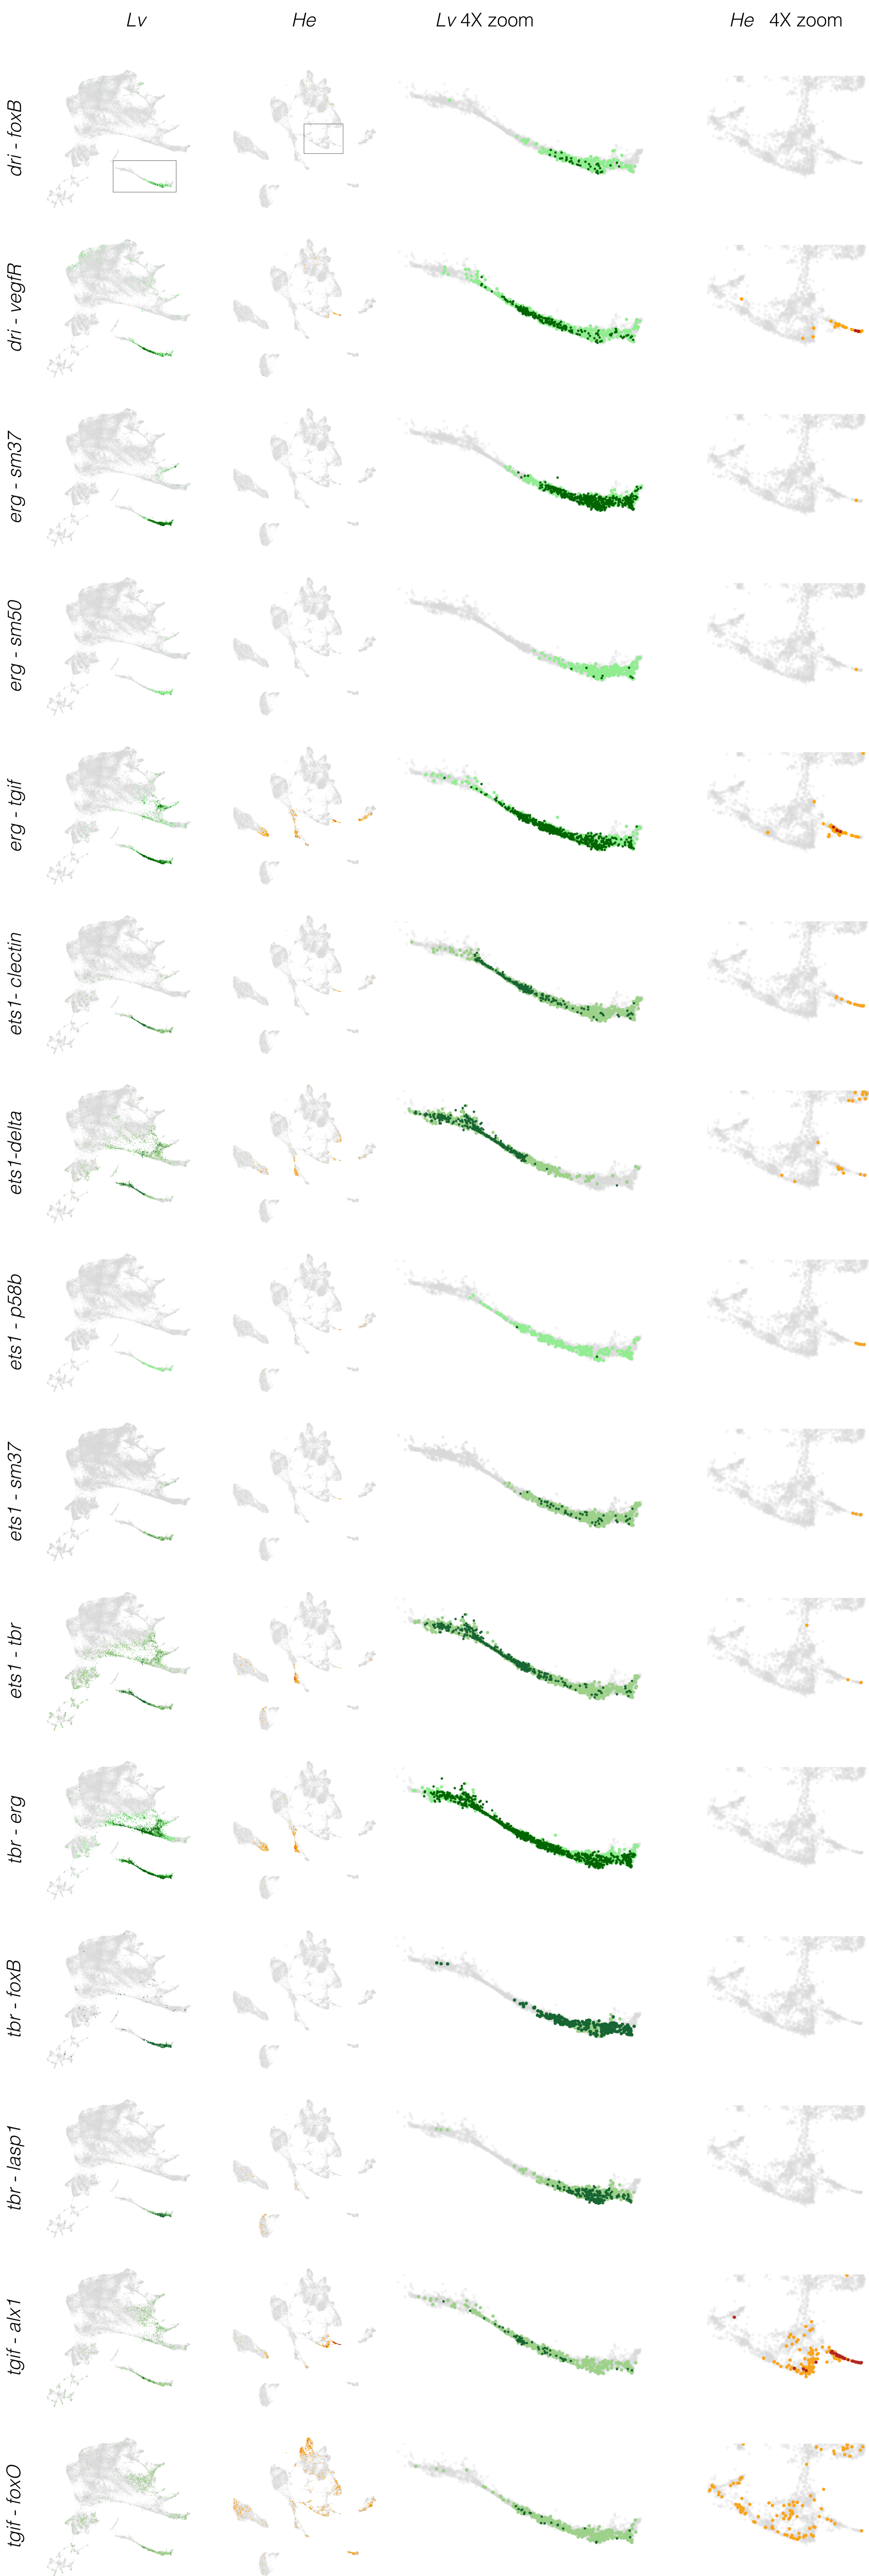

Supplement: media-8.pdf [file media-8.pdf]
