# Supplementary material for: Single-cell transcriptomics reveals evolutionary reconfiguration of embryonic cell fate specification in the sea urchin Heliocidaris erythrogramma
Source: PubMed Central journal article supplement (PMC11092583; doi:10.1101/2024.04.30.591752), 2024-05-01

regulator expression

regulator + target co-expression

*ets1 - sm32*

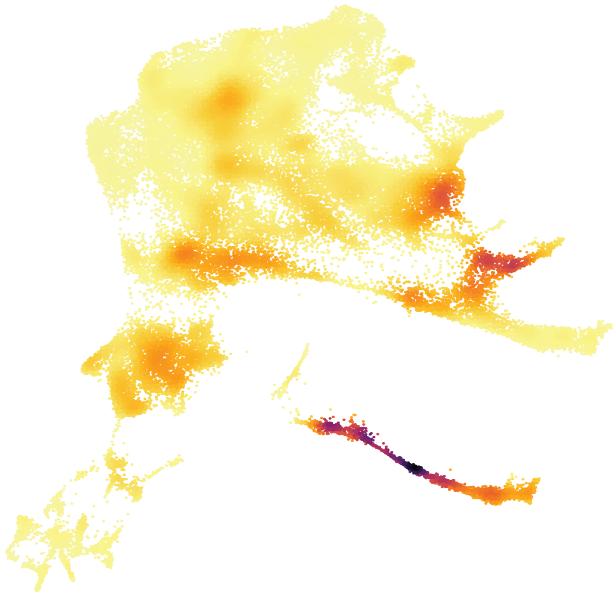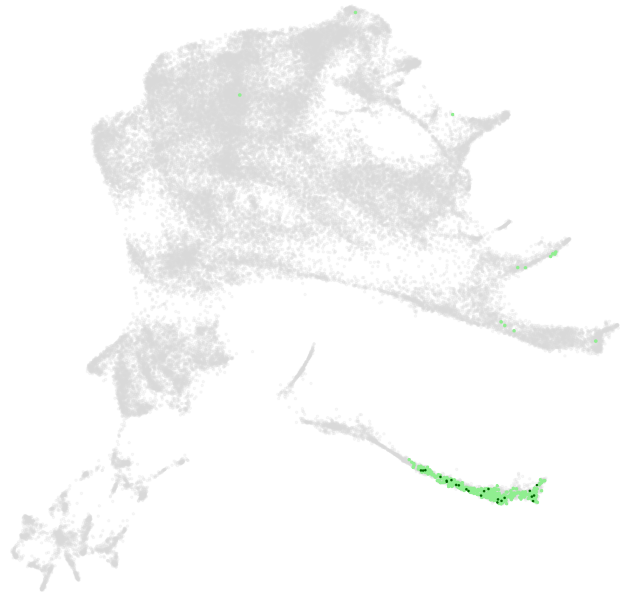

*tbr - foxB*

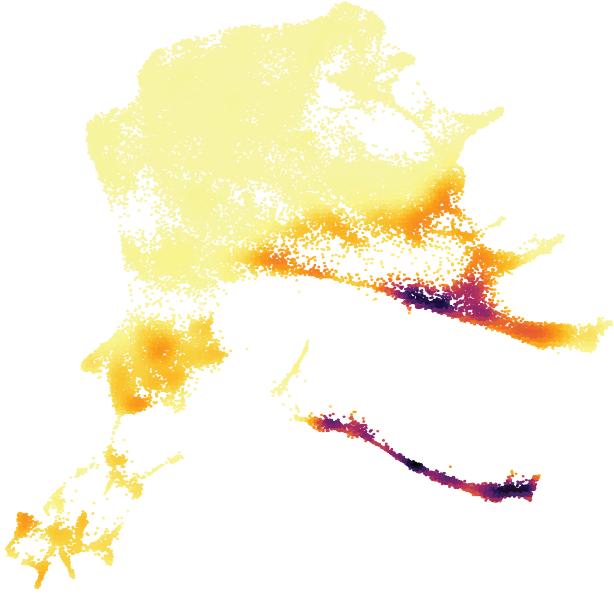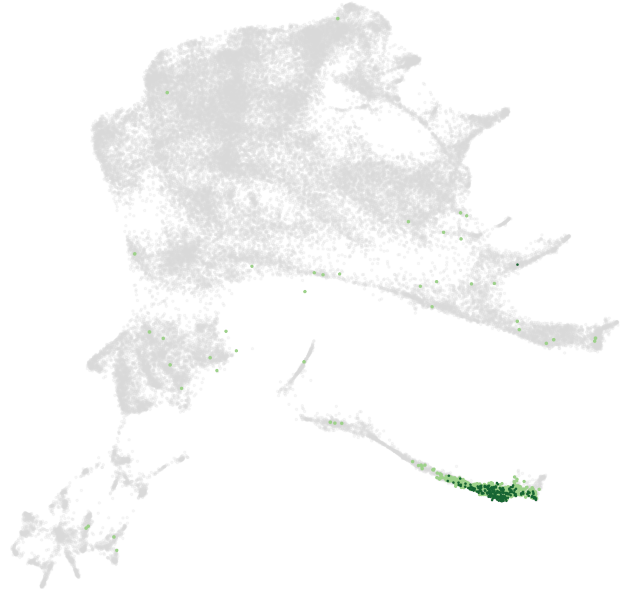

*otx - endo16*

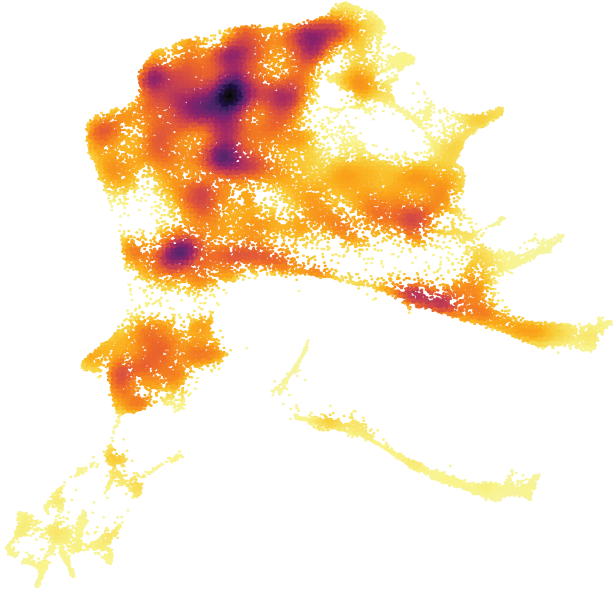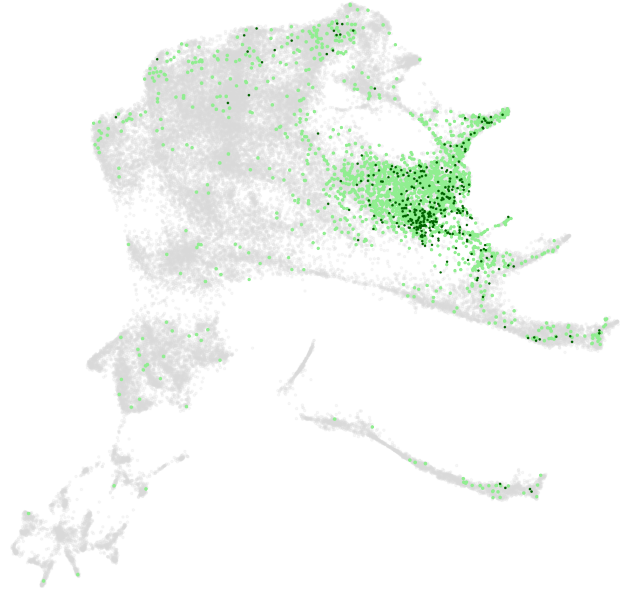

*gataE - pks1*

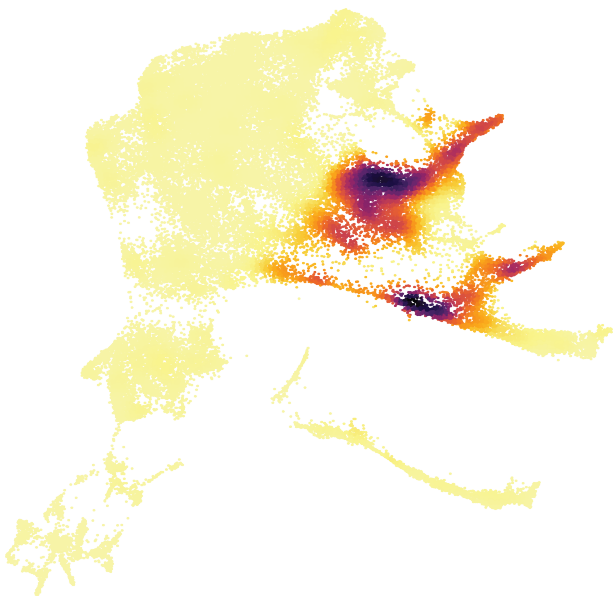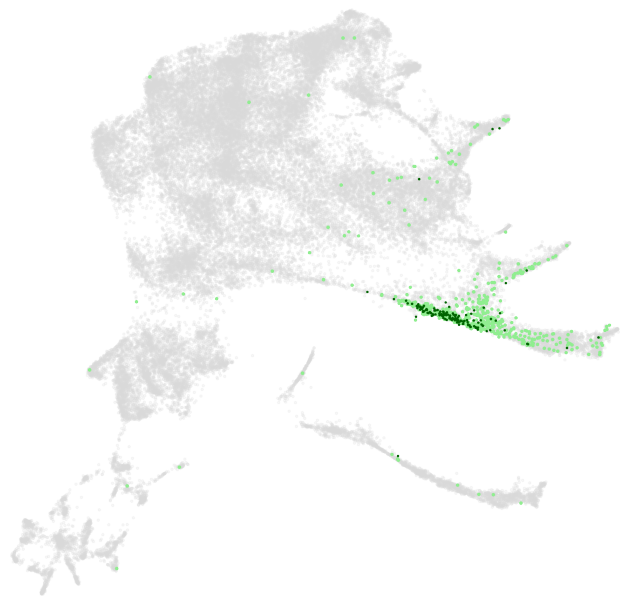

*alx1 - sm37*

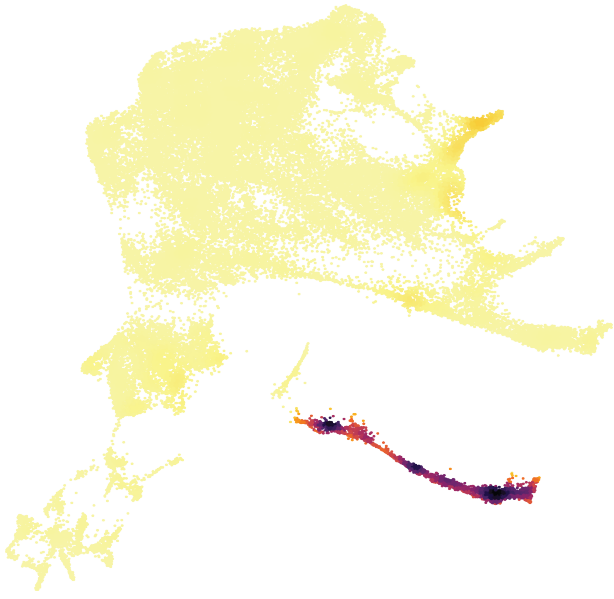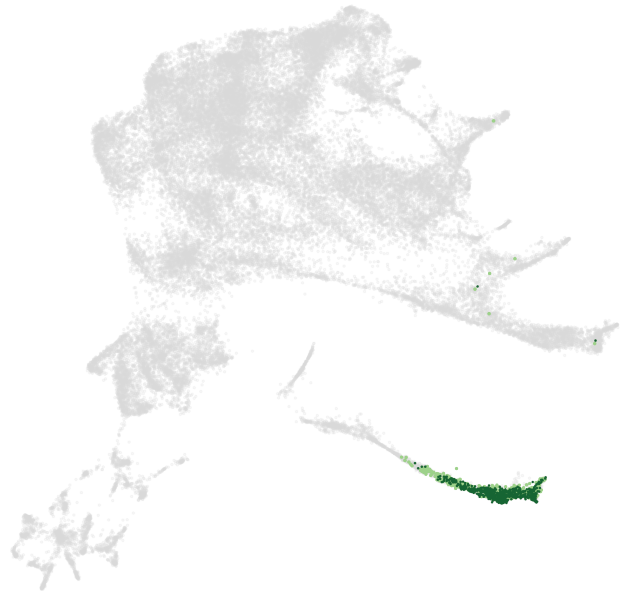

Supplement: media-9.pdf [file media-9.pdf]
